# Supplementary material
Source: publisher site journal article supplement (https://www.dovepress.com/article/361705)
Supplement: Supplementary file 1 [file get_supplementary_file.php]

**Supplementary**

**Supplementary Table 1. Demographics of the study population**

| **Variables** | **Total** (n= 4479) | **Males** (n= 2616) | **Females** (n= 1863) | **P value** |
| --- | --- | --- | --- | --- |
| Age, years | 67.9 ± 13.5 | 65.1 ± 13.7 | 71.8 ± 12.2 | <0.001 |
| DM, n (%) | 2913 (65.0) | 1632 (62.4) | 1281 (68.8) | <0.001 |
| Hypertension, n (%) | 3680 (82.2) | 2054 (78.5) | 1626 (87.3) | <0.001 |
| Gout, n (%) | 351 (7.8) | 237 (9.1) | 114 (6.1) | <0.001 |
| Hyperlipidemia, n (%) | 2794 (62.4) | 1688 (64.5) | 1106 (59.4) | <0.001 |
| **Biochemistry** | | | |  |
| ALT, IU/L | 29.7 ± 41.3 | 31.7 ± 35.9 | 26.9 ± 47.8 | <0.001 |
| Creatinine, mg/dL | 1.7 ± 2.0 | 1.8 ± 2.1 | 1.7 ± 2.0 | 0.106 |
| eGFR, ml/min | 68.2 ± 40.3 | 69.7 ± 38.5 | 66.2 ± 42.8 | 0.012 |
| Glucose, mg/dL | 125.6 ± 50.7 | 124.1 ± 49.4 | 127.7 ± 52.6 | 0.020 |
| Total cholesterol, mg/dL | 170.2 ± 47.9 | 168.4 ± 46.4 | 172.7 ± 49.9 | 0.003 |
| HDL-C, mg/dL | 40.3 ± 13.3 | 38.6 ± 12.5 | 42.5 ± 13.9 | <0.001 |
| LDL-C, mg/dL | 101.9 ± 39.1 | 102.6 ± 38.1 | 100.9 ± 40.4 | 0.155 |
| VLDL-C, mg/dL | 28.0 ± 17.8 | 27.1 ± 17.5 | 29.3 ± 18.1 | <0.001 |
| Triglyceride, mg/dL | 134.2 ± 94.5 | 133.3 ± 100.3 | 135.4 ± 85.7 | 0.451 |
| **Medications** | | | |  |
| ß-blocker, n (%) | 352 (7.9) | 175 (6.7) | 177 (9.5) | <0.001 |
| Lipid-lowering, n (%) | 107 (2.4) | 68 (2.6) | 39 (2.1) | 0.274 |
| Antiarrhythmics, n (%) | 32 (0.7) | 20 (0.8) | 12 (0.6) | 0.637 |
| Anti-coagulants, n (%) | 150 (3.3) | 104 (4) | 46 (2.5) | 0.005 |
| **Electrocardiographic parameters** | | | |  |
| P, msec | 109.9 ± 17.9 | 110.9 ± 17.4 | 108.5 ± 18.6 | <0.001 |
| PR, msec | 171.8 ± 32.9 | 172.9 ± 32.7 | 170.2 ± 33.0 | 0.006 |
| QRS, msec | 94.6 ± 24.1 | 97.7 ± 26.5 | 90.3 ± 19.3 | <0.001 |
| QTc, msec | 426.3 ± 37.2 | 424.7 ± 36.5 | 428.5 ± 38.0 | <0.001 |
|  | | | | |

**Notes:** Values are given as mean ± SD or number, percentage in the specific group.

Chi-square is used for category variable.

P value is between males and females.

**Abbreviations:** DM, diabetes mellitus; ALT, alanine aminotransferase; eGFR, estimated glomerular filtration rate; HDL-C, high-density lipoprotein cholesterol; LDL-C, low-density lipoprotein cholesterol; VLDL-C, very-low-density lipoprotein cholesterol; P, P wave duration; PR, PR interval; QRS, QRS width; QTc, corrected QT interval.

**Supplementary** **Table 2**. **Comparisons between male and female subjects with and without AF**

|  | **Male** | | |  | **Female** | | |
| --- | --- | --- | --- | --- | --- | --- | --- |
|  | **AF (-)** | **AF (+)** | **P-value** |  | **AF (-)** | **AF (+)** | **P-value** |
|  | n= 2300 | n= 316 |  |  | n= 1625 | n= 238 |  |
| **Variables** | | | | | | | |
| Age (years) | 64.3 ± 13.6 | 71.2 ± 12.5 | <0.001 |  | 70.9 ± 12.3 | 77.6 ± 9.6 | <0.001 |
| DM, n (%) | 1451 (63.1) | 181 (57.3) | 0.046 |  | 1129 (69.5) | 152 (63.9) | 0.081 |
| Hypertension, n (%) | 1791 (77.9) | 263 (83.2) | 0.030 |  | 1415 (87.1) | 211 (88.7) | 0.495 |
| Gout, n (%) | 204 (8.9) | 33 (10.4) | 0.361 |  | 96 (5.9) | 18 (7.6) | 0.320 |
| Hyperlipidemia, n (%) | 1423 (61.9) | 156 (49.4) | <0.001 |  | 917 (56.4) | 116 (48.7) | 0.026 |
| **Biochemistry** | | | | | | | |
| GPT, IU/L | 32.3 ± 37.6 | 27.2 ± 17.9 | <0.001 |  | 27.1 ± 50.3 | 25.3 ± 22.3 | 0.433 |
| Creatinine, mg/dL | 1.8 ± 2.2 | 1.5 ± 1.1 | <0.001 |  | 1.7 ± 2.0 | 1.4 ± 1.7 | 0.029 |
| eGFR, ml/min | 70.4 ± 39.6 | 64.4 ± 28.7 | 0.003 |  | 66.5 ± 43.8 | 63.7 ± 34.0 | 0.310 |
| AC glucose, mg/dL | 124.6 ± 50.3 | 120.2 ± 41.8 | 0.113 |  | 128.4 ± 53.9 | 122.9 ± 41.9 | 0.110 |
| Total Cholesterol, mg/dL | 170.3 ± 46.7 | 154.5 ± 41.8 | <0.001 |  | 175.0 ± 50.4 | 157.6 ± 43.5 | <0.001 |
| HDL-C, mg/dL | 38.4 ± 12.4 | 40.1 ± 13.2 | 0.030 |  | 42.5 ± 13.9 | 43.1 ± 14.2 | 0.527 |
| LDL-C, mg/dL | 104.1 ± 38.4 | 92.0 ± 34.6 | <0.001 |  | 102.4 ± 40.8 | 91.1 ± 35.6 | <0.001 |
| VLDL-C, mg/dL | 27.8 ± 18.0 | 22.4 ± 13.3 | <0.001 |  | 30.1 ± 18.6 | 23.4 ± 13.3 | <0.001 |
| non-HDL-C, mg/dL | 131.9 ± 44.9 | 114.4 ± 40.0 | <0.001 |  | 132.5 ± 47.6 | 114.5 ± 41.4 | <0.001 |
| TG, mg/dL | 137.3 ± 103.4 | 104.2 ± 68.1 | <0.001 |  | 139.0 ± 88.1 | 110.8 ± 62.5 | <0.001 |
| **Medications** | | | | | | | |
| B-blocker, n (%) | 152 (6.6) | 23 (7.3) | 0.655 |  | 148 (9.1) | 29 (12.2) | 0.131 |
| Lipid-lowering, n (%) | 57 (2.5) | 11 (3.5) | 0.294 |  | 35 (2.2) | 4 (1.7) | 0.810 |
| Anti-arrhythmia, n (%) | 9 (0.4) | 11 (3.5) | <0.001 |  | 4 (0.2) | 8 (3.4) | <0.001 |
| Anti-coagulants, n (%) | 93 (4.0) | 11 (3.5) | 0.631 |  | 36 (2.2) | 9 (3.8) | 0.142 |
| **ECG parameters** | | | | | | | |
| QRS, ms | 97.5 ± 26.7 | 98.8 ± 25.3 | 0.425 |  | 90.1 ± 19.1 | 91.5 ± 20.7 | 0.285 |
| QTc, ms | 424.3 ± 35.1 | 428.0 ± 45.5 | 0.158 |  | 428.6 ± 35.7 | 427.7 ± 51.3 | 0.784 |
| QQRS, ms |  |  | 0.705 |  |  |  | 0.311 |
| Q1 (<82), n (%) | 479 (20.8) | 59 (18.7) |  |  | 602 (37.0) | 95 (39.9) |  |
| Q2 (82-90), n (%) | 563 (24.5) | 80 (25.3) |  |  | 456 (28.1) | 57 (23.9) |  |
| Q3 (90-100), n (%) | 579 (25.2) | 76 (24.1) |  |  | 300 (18.5) | 39 (16.4) |  |
| Q4 (>100), n (%) | 679 (29.5) | 101 (32.0) |  |  | 267 (16.4) | 47 (19.7) |  |
| QQTc (ms) |  |  | 0.002 |  |  |  | 0.079 |
| Q1 (<404), n (%) | 604 (26.3) | 86 (27.2) |  |  | 368 (22.6) | 72 (30.3) |  |
| Q2 (404-424), n (%) | 631 (27.4) | 60 (19.0) |  |  | 402 (24.7) | 55 (23.1) |  |
| Q3 (424-444), n (%) | 571 (24.8) | 77 (24.4) |  |  | 410 (25.2) | 52 (21.8) |  |
| Q4 (>444), n (%) | 494 (21.5) | 93 (29.4) |  |  | 445 (27.4) | 59 (24.8) |  |

**Supplementary Table 3. Correlations of clinical characteristics and other electrocardiographic parameters in the quartiles of QTc of male subjects**

| Variables | Q1 (<404 ms) N=604 | Q2 (404-424 ms) N=631 | Q3 (424-444 ms) N=571 | Q4 (>444 ms) N=494 | p-value |
| --- | --- | --- | --- | --- | --- |
| Age | 61.6 ± 13.8 | 62.3 ± 13.3 | 64.7 ± 13.4 | 68.3 ± 12.9 | 0.006 |
| VLDL-C | 28.5 ± 18.5 | 28.4 ± 18.5 | 27.3 ± 18.6 | 27.1 ± 16.2 | 0.224 |
| TG | 140.5 ± 116.9 | 143.9 ± 105.8 | 135.5 ± 99.6 | 130.2 ± 90.2 | 0.022 |
| Cholesterol | 168.6 ± 46.9 | 173.8 ± 46.7 | 172.5 ± 48.2 | 166.8 ± 44.8 | 0.247 |
| HDL-C | 38.3 ± 13.4 | 37.9 ± 11.2 | 38.8 ± 11.8 | 38.8 ± 13.1 | 0.978 |
| LDL-C | 101.8 ± 38.5 | 107.5 ± 38.1 | 106.4 ± 39.1 | 100.9 ± 37.5 | 0.479 |
| Non-HDL-C | 130.3 ± 44.4 | 135.9 ± 44.7 | 133.7 ± 46.9 | 128.0 ± 43.3 | 0.232 |
| GPT | 32.0 ± 26.9 | 35.9 ± 53.4 | 33.4 ± 40.4 | 28.0 ± 21.2 | 0.562 |
| eGFR | 76.3 ± 51.3 | 73.1 ± 33.1 | 70.2 ± 37.2 | 62.7 ± 33.9 | <0.001 |
| AC glucose | 124.2 ± 47.9 | 125.9 ± 52.2 | 127.0 ± 48.8 | 121.8 ± 52.1 | 0.847 |
| DM | 397 (65.7) | 378 (62.6) | 348 (57.6) | 328 (54.3) | 0.046 |
| Hypertension | 459 (76.0) | 479 (79.3) | 463 (76.7) | 390 (64.6) | 0.094 |
| Hyperlipidemia | 390 (64.6) | 401 (66.4) | 355 (58.8) | 277 (45.9) | 0.022 |
| B-blocker | 36 (6.0) | 38 (6.3) | 41 (6.8) | 37 (6.1) | 0.640 |
| CC-blocker | ≦2 (0) | ≦2 (0) | ≦2 (0) | ≦2 (0) | N.A. |
| Lipid-lowering | 13 (2.2) | 14 (2.3) | 13 (2.2) | 17 (2.8) | 0.488 |
| Antiarrhythmia | ≦2 (0) | ≦2 (0) | 4 (0.7) | ≦2 (0) | 0.518 |
| Anti-coagulants | 11 (1.8) | 42 (7.0) | 23 (3.8) | 17 (2.8) | <0.001 |
| Gout | 39 (6.5) | 65 (10.8) | 51 (8.4) | 49 (8.1) | 0.085 |
| Sleep apnea | ≦2 (0) | ≦2 (0) | ≦2 (0) | ≦2 (0) | N.A. |
| PR (ms) | 138.3 ± 10.4 | 159.3 ± 4.6 | 176.8 ± 5.8 | 214.2 ± 30.7 | <0.001 |
| QRS (ms) | 95.3 ± 34.2 | 95.6 ± 25.3 | 97.9 ± 20.7 | 101.0 ± 24.4 | <0.001 |
| P (ms) | 104.6 ± 15.0 | 111.5 ± 16.1 | 112.9 ± 17.4 | 114.4 ± 18.9 | 0.896 |

**Supplementary Table 4. Correlations of clinical characteristics and other electrocardiographic parameters in the quartiles of QTc of female subjects**

| | Variables | Q1 (<404 ms) N=368 | Q2 (404-424 ms) N=402 | Q3 (424-444 ms) N=410 | Q4 (>444 ms) N=445 | p-value | | --- | --- | --- | --- | --- | --- | | Age | 69.0 ± 12.3 | 69.3 ± 12.7 | 71.1 ± 11.5 | 74.8 ± 11.8 | 0.266 | | VLDL-C | 30.6 ± 17.5 | 29.7 ± 17.1 | 30.1 ± 18.4 | 30.1 ± 21.6 | 0.009 | | TG | 141.9 ± 88.8 | 137.1 ± 85.6 | 137.2 ± 85.3 | 140.2 ± 93.2 | 0.017 | | Cholesterol | 174.5 ± 48.8 | 178.9 ± 52.3 | 174.9 ± 49.9 | 171.7 ± 50.2 | 0.102 | | HDL-C | 41.8 ± 14.4 | 43.0 ± 14.2 | 43.2 ± 13.9 | 41.9 ± 13.0 | 0.191 | | LDL-C | 102.1 ± 40.6 | 106.1 ± 42.1 | 101.5 ± 40.4 | 99.7 ± 39.7 | 0.261 | | Non-HDL-C | 132.7 ± 45.2 | 135.9 ± 48.9 | 131.6 ± 48.3 | 129.9 ± 48.0 | 0.169 | | GPT | 27.9 ± 36.0 | 31.3 ± 83.3 | 24.2 ± 23.0 | 24.4 ± 33.3 | 0.764 | | eGFR | 69.7 ± 43.2 | 73.0 ± 40.9 | 63.5 ± 41.9 | 58.8 ± 48.4 | <0.001 | | AC glucose | 124.0 ± 51.6 | 129.8 ± 52.9 | 129.7 ± 56.1 | 130.4 ± 55.4 | 0.165 | | DM | 233 (63.3) | 292 (72.6) | 286 (69.8) | 318 (71.5) | 0.025 | | Hypertension | 318 (86.4) | 350 (87.1) | 359 (87.6) | 388 (87.2) | 0.972 | | Hyperlipidemia | 205 (55.7) | 225 (56.0) | 239 (58.3) | 248 (55.7) | 0.854 | | B-blocker | 40 (10.9) | 30 (7.5) | 29 (7.1) | 49 (11.0) | 0.082 | | CC-blocker | ≦2 (0) | ≦2 (0) | ≦2 (0) | ≦2 (0) | N.A. | | Lipid-lowering | 6 (1.6) | 10 (2.5) | 10 (2.4) | 9 (2.0) | 0.829 | | Antiarrhythmia | 3 (0.8) | ≦2 (0) | ≦2 (0) | ≦2 (0) | N.A. | | Antu-coagulants | 7 (1.9) | 5 (1.2) | 9 (2.2) | 15 (3.4) | 0.198 | | Gout | 16 (4.3) | 23 (5.7) | 22 (5.4) | 35 (7.9) | 0.178 | | Sleep apnea | ≦2 (0) | ≦2 (0) | ≦2 (0) | ≦2 (0) | N.A. | | PR (ms) | 137.2 ± 12.1 | 159.1 ± 4.7 | 176.4 ± 5.7 | 216.3 ± 31.4 | 0.027 | | QRS (ms) | 86.1 ± 16.2 | 89.3 ± 20.5 | 91.8 ± 18.5 | 94.0 ± 20.2 | <0.001 | | P (ms) | 100.9 ± 15.9 | 107.5 ± 16.9 | 111.6 ± 18.1 | 115.5 ± 20.5 | 0.013 | |
| --- | --- | --- | --- | --- | --- | --- | --- | --- | --- | --- | --- | --- | --- | --- | --- | --- | --- | --- | --- | --- | --- | --- | --- | --- | --- | --- | --- | --- | --- | --- | --- | --- | --- | --- | --- | --- | --- | --- | --- | --- | --- | --- | --- | --- | --- | --- | --- | --- | --- | --- | --- | --- | --- | --- | --- | --- | --- | --- | --- | --- | --- | --- | --- | --- | --- | --- | --- | --- | --- | --- | --- | --- | --- | --- | --- | --- | --- | --- | --- | --- | --- | --- | --- | --- | --- | --- | --- | --- | --- | --- | --- | --- | --- | --- | --- | --- | --- | --- | --- | --- | --- | --- | --- | --- | --- | --- | --- | --- | --- | --- | --- | --- | --- | --- | --- | --- | --- | --- | --- | --- | --- | --- | --- | --- | --- | --- | --- | --- | --- | --- | --- | --- | --- | --- | --- | --- | --- | --- | --- | --- | --- | --- | --- | --- |
